# Supplementary material
Source: MDPI journal article supplement (https://www.mdpi.com/1424-2818/15/2/303)
Supplement: s1 [file s1]

# Supplementary Material

**Table S1:** List of ground-dwelling beetles and their abundance along the rural-urban gradient in Wadi Hanifa, Riyadh, Saudi Arabia.

| Family      | Species                                                       | Code | Rural |      |      |      |      |     | Suburban |      |      |      |      |     | Urban |      |      |      |      |     | Total |
|-------------|---------------------------------------------------------------|------|-------|------|------|------|------|-----|----------|------|------|------|------|-----|-------|------|------|------|------|-----|-------|
|             |                                                               |      | WHR1  | WHR2 | WHR3 | WHR4 | WHR5 | WHR | WHS1     | WHS2 | WHS3 | WHS4 | WHS5 | WHS | WHU1  | WHU2 | WHU3 | WHU4 | WHU5 | WHU |       |
| Anthicidae  | <i>Anthelephila caeruleipennis</i> (La Ferté-Sénéctère, 1847) | SP1  | 0     | 0    | 0    | 1    | 0    | 1   | 0        | 0    | 0    | 0    | 0    | 0   | 4     | 34   | 50   | 210  | 32   | 330 | 331   |
| Anthicidae  | <i>Anthelephila ionica</i> (LaFerté-Sénéctère, 1849)          | SP2  | 0     | 0    | 11   | 10   | 0    | 21  | 0        | 0    | 0    | 0    | 0    | 0   | 0     | 0    | 0    | 2    | 0    | 2   | 23    |
| Anthicidae  | <i>Anthelephila</i> sp.                                       | SP3  | 0     | 0    | 0    | 0    | 0    | 0   | 0        | 0    | 1    | 0    | 0    | 1   | 0     | 0    | 3    | 0    | 0    | 3   | 4     |
| Anthicidae  | <i>Anthicus crinitus</i> LaFerté-Sénéctère, 1849              | SP4  | 1     | 0    | 0    | 5    | 1    | 7   | 0        | 0    | 0    | 0    | 0    | 0   | 11    | 15   | 36   | 9    | 72   | 143 | 150   |
| Anthicidae  | <i>Endomia lefebvrei</i> (LaFerté-Sénéctère, 1849)            | SP5  | 0     | 0    | 0    | 0    | 0    | 0   | 0        | 0    | 0    | 0    | 0    | 0   | 3     | 3    | 6    | 5    | 3    | 20  | 20    |
| Anthicidae  | <i>Omonadus floralis</i> (Linnaeus, 1758)                     | SP6  | 0     | 0    | 0    | 0    | 0    | 0   | 1        | 0    | 0    | 0    | 0    | 1   | 0     | 1    | 0    | 3    | 0    | 4   | 5     |
| Carabidae   | <i>Anthia duodecimguttata</i> Bonelli, 1813                   | SP7  | 0     | 2    | 1    | 1    | 0    | 4   | 0        | 0    | 0    | 0    | 0    | 0   | 0     | 0    | 0    | 0    | 0    | 0   | 4     |
| Carabidae   | <i>Apristus striatipennis</i> (Lucas, 1846)                   | SP8  | 0     | 0    | 0    | 0    | 0    | 0   | 0        | 0    | 0    | 0    | 0    | 0   | 0     | 0    | 1    | 0    | 0    | 1   | 1     |
| Carabidae   | <i>Bembidion wittmeri</i> (Basilewsky, 1979)                  | SP9  | 1     | 0    | 51   | 90   | 8    | 150 | 0        | 0    | 0    | 0    | 0    | 0   | 3     | 0    | 1    | 2    | 32   | 38  | 188   |
| Carabidae   | <i>Calosoma olivieri</i> Dejean, 1831_Sp                      | SP10 | 0     | 0    | 0    | 2    | 0    | 2   | 0        | 0    | 0    | 0    | 0    | 0   | 0     | 0    | 0    | 0    | 0    | 0   | 2     |
| Carabidae   | <i>Eremolestes sulcatus</i> (Chaudoir, 1876)                  | SP11 | 0     | 0    | 1    | 1    | 1    | 3   | 0        | 0    | 0    | 0    | 0    | 0   | 0     | 0    | 0    | 0    | 0    | 0   | 3     |
| Carabidae   | <i>Masoreus wetterhallii</i> (Gyllenhal, 1813)                | SP12 | 0     | 0    | 0    | 3    | 3    | 6   | 0        | 0    | 0    | 0    | 0    | 0   | 0     | 0    | 0    | 0    | 0    | 0   | 6     |
| Carabidae   | <i>Mesolestes quadriguttatus</i> (Mateu, 1979)                | SP13 | 1     | 1    | 0    | 2    | 8    | 12  | 0        | 0    | 0    | 0    | 0    | 0   | 0     | 0    | 0    | 0    | 0    | 0   | 12    |
| Carabidae   | <i>Metadromius arabicus</i> Mateu, 1979                       | SP14 | 0     | 0    | 0    | 0    | 0    | 0   | 1        | 0    | 0    | 0    | 0    | 1   | 0     | 0    | 0    | 0    | 0    | 0   | 1     |
| Carabidae   | <i>Microlestes discoidalis</i> (Fairmaire, 1892)              | SP15 | 0     | 0    | 0    | 1    | 0    | 1   | 0        | 0    | 0    | 0    | 0    | 0   | 0     | 0    | 0    | 0    | 0    | 0   | 1     |
| Carabidae   | <i>Microlestes infuscatus</i> (Motschulsky, 1859)             | SP16 | 0     | 0    | 0    | 0    | 0    | 0   | 0        | 0    | 0    | 0    | 0    | 0   | 0     | 1    | 3    | 1    | 0    | 5   | 5     |
| Carabidae   | <i>Stenolophus marginatus</i> Dejean, 1829                    | SP17 | 0     | 0    | 0    | 0    | 1    | 1   | 0        | 0    | 0    | 0    | 0    | 0   | 0     | 0    | 0    | 0    | 0    | 0   | 1     |
| Dermestidae | <i>Anthrenus malkini</i> Mroczkowski, 1980                    | SP19 | 0     | 0    | 0    | 0    | 0    | 0   | 0        | 1    | 1    | 0    | 0    | 2   | 0     | 0    | 0    | 0    | 0    | 0   | 2     |
| Dermestidae | <i>Attagenus lobatus</i> Rosenhauer, 1856                     | SP20 | 0     | 0    | 1    | 0    | 0    | 1   | 0        | 0    | 0    | 0    | 0    | 0   | 0     | 0    | 0    | 0    | 0    | 0   | 1     |
| Dermestidae | <i>Attagenus lynx</i> (Mulsant et Rey, 1868)                  | SP21 | 2     | 4    | 2    | 0    | 0    | 8   | 0        | 8    | 0    | 0    | 6    | 14  | 0     | 0    | 0    | 0    | 0    | 0   | 22    |
| Dermestidae | <i>Phradonoma nobile</i> (Reitter, 1881)                      | SP22 | 0     | 0    | 0    | 0    | 0    | 0   | 0        | 0    | 2    | 0    | 0    | 2   | 0     | 0    | 0    | 0    | 0    | 0   | 2     |
| Dermestidae | <i>Thorictus hanifahensis</i> Háva & Abdel-Dayem, 2021        | SP24 | 0     | 0    | 0    | 0    | 0    | 0   | 1        | 0    | 0    | 0    | 0    | 1   | 0     | 0    | 0    | 0    | 0    | 0   | 1     |
| Dermestidae | <i>Thorictus riyadhensis</i> Háva & Abdel-Dayem, 2021         | SP23 | 0     | 0    | 0    | 0    | 0    | 0   | 0        | 0    | 0    | 1    | 0    | 1   | 0     | 0    | 0    | 0    | 0    | 0   | 1     |

|              |                                                       |      |   |   |    |    |   |    |   |   |   |   |   |    |   |    |    |    |   |    |    |
|--------------|-------------------------------------------------------|------|---|---|----|----|---|----|---|---|---|---|---|----|---|----|----|----|---|----|----|
| Elateridae   | <i>Aeoloides grisescens</i> (Germar, 1844)            | SP25 | 0 | 0 | 0  | 0  | 0 | 0  | 0 | 0 | 0 | 0 | 0 | 0  | 0 | 1  | 0  | 0  | 1 | 2  | 2  |
| Elateridae   | <i>Craspedostethus dilutus</i> (Erichson, 1840)       | SP26 | 0 | 0 | 0  | 0  | 0 | 0  | 1 | 0 | 0 | 1 | 0 | 2  | 0 | 0  | 0  | 0  | 0 | 0  | 2  |
| Elateridae   | <i>Dicronychus brancuccii</i> Platia & Schimmel, 1997 | SP27 | 0 | 0 | 0  | 7  | 1 | 8  | 0 | 0 | 0 | 1 | 1 | 2  | 0 | 0  | 0  | 0  | 0 | 0  | 10 |
| Elateridae   | <i>Dicronychus latifae</i> Al Dhafer & Platia, 2013   | SP28 | 0 | 0 | 0  | 3  | 0 | 3  | 0 | 0 | 0 | 0 | 0 | 0  | 0 | 0  | 0  | 0  | 0 | 0  | 3  |
| Elateridae   | <i>Dicronychus</i> sp.                                | SP29 | 0 | 0 | 0  | 1  | 0 | 1  | 0 | 0 | 0 | 0 | 0 | 0  | 0 | 0  | 0  | 0  | 0 | 0  | 1  |
| Elateridae   | <i>Dieronychus talhouki</i> Platia & Schimmel 1997    | SP30 | 0 | 0 | 0  | 14 | 3 | 17 | 1 | 1 | 0 | 0 | 0 | 2  | 0 | 0  | 0  | 0  | 0 | 0  | 19 |
| Elateridae   | <i>Drasterius aegyptiacus</i> Buysson, 1905           | SP31 | 0 | 0 | 0  | 0  | 0 | 0  | 0 | 0 | 0 | 0 | 0 | 0  | 3 | 0  | 16 | 0  | 0 | 19 | 19 |
| Elateridae   | <i>Heteroderes gallagheri</i> Platia & Schimmel, 1997 | SP32 | 0 | 0 | 1  | 1  | 0 | 2  | 0 | 0 | 0 | 0 | 0 | 0  | 0 | 0  | 0  | 0  | 0 | 0  | 2  |
| Elateridae   | <i>Heteroderes musculus</i> (Germar, 1844)            | SP33 | 0 | 0 | 1  | 8  | 3 | 12 | 0 | 0 | 1 | 2 | 2 | 5  | 0 | 0  | 0  | 0  | 0 | 0  | 17 |
| Elateridae   | <i>Heteroderes omanensis</i> Platia & Schimmel, 1997  | SP34 | 0 | 0 | 0  | 8  | 0 | 8  | 0 | 0 | 0 | 0 | 0 | 0  | 0 | 0  | 0  | 0  | 0 | 0  | 8  |
| Elateridae   | <i>Heteroderes ruteri</i> Chassain, 1979              | SP35 | 0 | 2 | 17 | 53 | 7 | 79 | 0 | 0 | 1 | 7 | 3 | 11 | 0 | 0  | 0  | 0  | 0 | 0  | 90 |
| Elateridae   | <i>Heteroderes</i> sp.                                | SP36 | 0 | 0 | 0  | 3  | 0 | 3  | 0 | 0 | 0 | 0 | 0 | 0  | 0 | 0  | 0  | 0  | 0 | 0  | 3  |
| Glaresidae   | <i>Glaresis arabica</i> Paulian, 1980                 | SP52 | 1 | 0 | 0  | 2  | 0 | 3  | 0 | 0 | 0 | 0 | 0 | 0  | 0 | 0  | 0  | 0  | 0 | 0  | 3  |
| Histeridae   | <i>Atholus bimaculatus</i> (Linnaeus, 1758)           | SP37 | 0 | 1 | 1  | 16 | 1 | 19 | 0 | 0 | 1 | 1 | 0 | 2  | 0 | 0  | 0  | 0  | 0 | 0  | 21 |
| Histeridae   | <i>Saprinus</i> sp.1                                  | SP38 | 0 | 0 | 0  | 0  | 0 | 0  | 0 | 0 | 0 | 0 | 0 | 0  | 0 | 0  | 0  | 1  | 0 | 1  | 1  |
| Histeridae   | <i>Saprinus</i> sp.2                                  | SP39 | 0 | 0 | 0  | 1  | 0 | 1  | 0 | 0 | 0 | 0 | 0 | 0  | 0 | 0  | 0  | 0  | 0 | 0  | 1  |
| Histeridae   | <i>Saprinus</i> sp.3                                  | SP40 | 0 | 1 | 0  | 4  | 0 | 5  | 0 | 0 | 0 | 0 | 0 | 0  | 0 | 0  | 0  | 0  | 0 | 0  | 5  |
| Histeridae   | <i>Saprinus</i> sp.4                                  | SP41 | 0 | 1 | 0  | 0  | 0 | 1  | 0 | 0 | 0 | 0 | 0 | 0  | 0 | 0  | 0  | 0  | 0 | 0  | 1  |
| Histeridae   | <i>Saprinus</i> sp.5                                  | SP42 | 1 | 0 | 0  | 0  | 0 | 1  | 0 | 0 | 0 | 0 | 0 | 0  | 0 | 0  | 0  | 0  | 0 | 0  | 1  |
| Histeridae   | <i>Saprinus</i> sp.6                                  | SP43 | 0 | 1 | 0  | 1  | 0 | 2  | 0 | 0 | 0 | 0 | 0 | 0  | 0 | 0  | 0  | 0  | 0 | 0  | 2  |
| Histeridae   | <i>Saprinus</i> sp.7                                  | SP44 | 0 | 1 | 0  | 1  | 0 | 2  | 0 | 1 | 0 | 0 | 0 | 1  | 0 | 0  | 0  | 0  | 0 | 0  | 3  |
| Scarabaeidae | <i>Ablaberoides abyssinicus</i> (Brenske, 1902)       | SP45 | 0 | 0 | 15 | 0  | 1 | 16 | 0 | 0 | 0 | 0 | 0 | 0  | 0 | 0  | 0  | 0  | 0 | 0  | 16 |
| Scarabaeidae | <i>Adoretus granulifrons</i> Fairmaire, 1882          | SP46 | 0 | 0 | 0  | 0  | 0 | 0  | 0 | 0 | 0 | 7 | 0 | 7  | 0 | 0  | 0  | 0  | 0 | 0  | 7  |
| Scarabaeidae | <i>Aphodius lividus</i> Olivier, 1789                 | SP47 | 0 | 1 | 0  | 0  | 0 | 1  | 0 | 0 | 0 | 0 | 0 | 0  | 7 | 0  | 0  | 1  | 0 | 8  | 9  |
| Scarabaeidae | <i>Aphodius saoudi</i> Paulian, 1980                  | SP48 | 0 | 1 | 0  | 0  | 0 | 1  | 0 | 0 | 0 | 0 | 0 | 0  | 0 | 0  | 0  | 0  | 0 | 0  | 1  |
| Scarabaeidae | <i>Aphodius</i> sp.                                   | SP49 | 0 | 1 | 0  | 3  | 2 | 6  | 0 | 2 | 0 | 0 | 0 | 2  | 0 | 0  | 0  | 0  | 0 | 0  | 8  |
| Scarabaeidae | <i>Maladera insanabilis</i> (Brenske, 1894)           | SP53 | 0 | 0 | 0  | 0  | 0 | 0  | 0 | 0 | 5 | 0 | 0 | 5  | 5 | 13 | 0  | 16 | 1 | 35 | 40 |
| Scarabaeidae | <i>Onthophagus sellatus</i> Klug, 1845                | SP54 | 0 | 0 | 0  | 0  | 0 | 0  | 0 | 0 | 0 | 0 | 0 | 0  | 0 | 0  | 0  | 2  | 0 | 2  | 2  |
| Scarabaeidae | <i>Pentodon algerinus</i> (Füessly, 1778)             | SP55 | 0 | 0 | 0  | 0  | 0 | 0  | 0 | 0 | 0 | 0 | 0 | 0  | 1 | 0  | 1  | 1  | 0 | 3  | 3  |

|               |                                                          |      |     |    |    |    |    |     |    |    |    |    |    |     |    |   |    |   |    |    |     |
|---------------|----------------------------------------------------------|------|-----|----|----|----|----|-----|----|----|----|----|----|-----|----|---|----|---|----|----|-----|
| Scarabaeidae  | <i>Phaeadoritus iranicus</i> Machatschke, 1960           | SP56 | 0   | 0  | 0  | 0  | 1  | 1   | 0  | 0  | 0  | 0  | 1  | 1   | 0  | 0 | 0  | 1 | 0  | 1  | 3   |
| Scarabaeidae  | <i>Platytomus yadai</i> (Ochi, Kawahara & Inagaki, 2006) | SP57 | 0   | 0  | 0  | 0  | 0  | 0   | 0  | 0  | 0  | 0  | 0  | 0   | 0  | 0 | 3  | 0 | 0  | 3  | 3   |
| Scarabaeidae  | <i>Rhyssesus saudi</i> Pittion, 1984                     | SP58 | 0   | 0  | 2  | 3  | 0  | 5   | 2  | 2  | 1  | 2  | 0  | 7   | 0  | 1 | 4  | 0 | 0  | 5  | 17  |
| Scarabaeidae  | <i>Scarabaeus cristatus</i> (Fabricius, 1775)            | SP51 | 0   | 1  | 0  | 0  | 0  | 1   | 0  | 0  | 0  | 0  | 0  | 0   | 0  | 0 | 0  | 0 | 0  | 0  | 1   |
| Scarabaeidae  | <i>Schizonycha</i> sp.                                   | SP59 | 0   | 0  | 1  | 0  | 0  | 1   | 0  | 0  | 0  | 0  | 0  | 0   | 0  | 0 | 0  | 0 | 0  | 0  | 1   |
| Scarabaeidae  | <i>Sphaerotrochalus</i> sp.                              | SP60 | 0   | 2  | 0  | 1  | 0  | 3   | 0  | 0  | 0  | 0  | 0  | 0   | 0  | 0 | 0  | 0 | 0  | 0  | 3   |
| Tenebrionidae | <i>Adelostoma subtile</i> Reitter, 1900                  | SP61 | 1   | 9  | 5  | 5  | 0  | 20  | 1  | 0  | 1  | 0  | 0  | 2   | 0  | 0 | 0  | 0 | 0  | 0  | 22  |
| Tenebrionidae | <i>Adesmia cancellata</i> Solier, 1835                   | SP62 | 3   | 7  | 9  | 8  | 8  | 35  | 44 | 11 | 14 | 21 | 16 | 106 | 1  | 0 | 0  | 0 | 0  | 1  | 142 |
| Tenebrionidae | <i>Adesmia stoeckleini</i> Koch, 1940                    | SP63 | 151 | 2  | 24 | 15 | 15 | 207 | 0  | 0  | 0  | 0  | 5  | 5   | 0  | 0 | 0  | 0 | 0  | 0  | 212 |
| Tenebrionidae | <i>Akis spinosa</i> (Linnaeus, 1764)                     | SP64 | 1   | 37 | 5  | 1  | 0  | 44  | 0  | 0  | 0  | 0  | 0  | 0   | 0  | 0 | 0  | 0 | 0  | 0  | 44  |
| Tenebrionidae | <i>Apentanodes arabicus</i> (Kirchsberg, 877)            | SP65 | 0   | 0  | 3  | 0  | 0  | 3   | 0  | 0  | 2  | 1  | 6  | 9   | 0  | 0 | 0  | 0 | 0  | 0  | 12  |
| Tenebrionidae | <i>Blaps kollari kollari</i> Seidlitz, 1896              | SP66 | 0   | 3  | 3  | 2  | 4  | 12  | 0  | 0  | 0  | 0  | 0  | 0   | 0  | 0 | 0  | 0 | 0  | 0  | 12  |
| Tenebrionidae | <i>Cheirodes brevicollis</i> Wollaston, 1864             | SP67 | 0   | 0  | 1  | 0  | 0  | 1   | 0  | 0  | 1  | 1  | 0  | 2   | 0  | 0 | 0  | 0 | 0  | 0  | 3   |
| Tenebrionidae | <i>Cheirodes sardous</i> Gené, 1839                      | SP68 | 0   | 0  | 0  | 0  | 0  | 0   | 0  | 0  | 0  | 0  | 1  | 1   | 0  | 0 | 0  | 0 | 0  | 0  | 1   |
| Tenebrionidae | <i>Erodium servillei</i> Solier, 1834                    | SP69 | 0   | 0  | 0  | 0  | 0  | 0   | 0  | 3  | 2  | 0  | 1  | 6   | 0  | 1 | 0  | 0 | 0  | 1  | 7   |
| Tenebrionidae | <i>Gonocephalum besnardi</i> Kaszab, 1982                | SP70 | 0   | 0  | 0  | 0  | 0  | 0   | 0  | 0  | 0  | 0  | 0  | 0   | 1  | 1 | 0  | 0 | 1  | 3  | 3   |
| Tenebrionidae | <i>Gonocephalum patruale</i> (Erichson, 1843)            | SP71 | 0   | 18 | 5  | 5  | 0  | 28  | 0  | 0  | 0  | 0  | 0  | 0   | 0  | 3 | 1  | 2 | 9  | 15 | 43  |
| Tenebrionidae | <i>Gonocephalum prolixum</i> (Erichson, 1843)            | SP72 | 0   | 7  | 25 | 41 | 1  | 74  | 0  | 0  | 0  | 0  | 0  | 0   | 34 | 1 | 4  | 6 | 11 | 56 | 130 |
| Tenebrionidae | <i>Gonocephalum rusticum</i> (Olivier, 1811)             | SP73 | 0   | 0  | 1  | 0  | 0  | 1   | 2  | 0  | 0  | 0  | 0  | 2   | 9  | 6 | 23 | 9 | 22 | 69 | 72  |
| Tenebrionidae | <i>Gonocephalum setulosum</i> (Fladermann, 1837)         | SP74 | 0   | 0  | 0  | 0  | 6  | 6   | 0  | 0  | 0  | 3  | 0  | 3   | 0  | 0 | 1  | 0 | 0  | 1  | 10  |
| Tenebrionidae | <i>Gonocephalum soricinum</i> (Reiche & Saulcy, 1857)    | SP75 | 0   | 0  | 1  | 3  | 2  | 6   | 6  | 2  | 2  | 1  | 0  | 11  | 0  | 0 | 0  | 0 | 0  | 0  | 17  |
| Tenebrionidae | <i>Mesostena puncticolis</i> Solier, 1835                | SP76 | 10  | 26 | 9  | 25 | 59 | 129 | 94 | 38 | 34 | 45 | 47 | 258 | 0  | 2 | 0  | 1 | 2  | 5  | 392 |
| Tenebrionidae | <i>Micipsa arabica</i> Kaszab, 1981                      | SP77 | 0   | 1  | 0  | 0  | 0  | 1   | 0  | 0  | 0  | 0  | 0  | 0   | 0  | 0 | 0  | 0 | 0  | 0  | 1   |
| Tenebrionidae | <i>Microdera marginata evansi</i> Blair, 1923            | SP78 | 0   | 0  | 0  | 0  | 0  | 0   | 0  | 1  | 0  | 0  | 0  | 1   | 0  | 0 | 0  | 0 | 0  | 0  | 1   |
| Tenebrionidae | <i>Mycetocharina vanharteni</i> Novák, 2008              | SP79 | 0   | 0  | 0  | 1  | 0  | 1   | 0  | 0  | 0  | 0  | 0  | 0   | 0  | 0 | 0  | 0 | 0  | 0  | 1   |
| Tenebrionidae | <i>Opatroides punctulatus</i> Brullé, 1832               | SP80 | 0   | 0  | 1  | 1  | 0  | 2   | 0  | 0  | 0  | 0  | 0  | 0   | 0  | 0 | 0  | 4 | 0  | 4  | 6   |
| Tenebrionidae | <i>Opatroides vicinus</i> (Fairmaire, 1896)              | SP81 | 0   | 1  | 1  | 2  | 2  | 6   | 0  | 0  | 0  | 0  | 0  | 0   | 0  | 3 | 0  | 1 | 0  | 4  | 10  |
| Tenebrionidae | <i>Oxycara saudarabica</i> Kaszab, 1979                  | SP82 | 8   | 2  | 4  | 8  | 9  | 31  | 0  | 5  | 3  | 4  | 16 | 28  | 0  | 0 | 0  | 0 | 0  | 0  | 59  |
| Tenebrionidae | <i>Pimelia nazarenoides</i> Kaszab, 1982                 | SP83 | 0   | 0  | 1  | 1  | 0  | 2   | 0  | 1  | 1  | 2  | 3  | 7   | 0  | 0 | 0  | 0 | 0  | 0  | 9   |

|               |                                                     |      |   |    |    |    |   |    |    |    |    |    |    |     |   |   |   |   |   |    |     |
|---------------|-----------------------------------------------------|------|---|----|----|----|---|----|----|----|----|----|----|-----|---|---|---|---|---|----|-----|
| Tenebrionidae | <i>Pimelia thomasi thomasi</i> Blair, 1931          | SP84 | 0 | 0  | 0  | 0  | 0 | 0  | 0  | 2  | 2  | 2  | 0  | 6   | 0 | 0 | 0 | 0 | 0 | 0  | 6   |
| Tenebrionidae | <i>Platynomus</i> sp.                               | SP85 | 0 | 0  | 0  | 0  | 1 | 1  | 0  | 0  | 0  | 0  | 0  | 0   | 0 | 0 | 0 | 0 | 0 | 0  | 1   |
| Tenebrionidae | <i>Scleropatroides</i> sp.                          | SP86 | 0 | 1  | 8  | 8  | 1 | 18 | 0  | 0  | 0  | 0  | 0  | 0   | 0 | 0 | 0 | 0 | 0 | 0  | 18  |
| Tenebrionidae | <i>Sclerum orientalis</i> (Fabricius, 1775)         | SP87 | 0 | 0  | 0  | 0  | 0 | 0  | 0  | 0  | 0  | 0  | 0  | 0   | 3 | 1 | 1 | 0 | 1 | 6  | 6   |
| Tenebrionidae | <i>Sclerum sulcatum</i> Baudi, 1876                 | SP88 | 0 | 0  | 0  | 0  | 0 | 0  | 0  | 1  | 0  | 0  | 1  | 2   | 0 | 0 | 0 | 0 | 0 | 0  | 2   |
| Tenebrionidae | <i>Sepidium tricuspidatum</i> Fabricius, 1775       | SP89 | 1 | 0  | 0  | 0  | 0 | 1  | 0  | 0  | 0  | 0  | 0  | 0   | 0 | 0 | 0 | 0 | 0 | 0  | 1   |
| Tenebrionidae | <i>Tentyrina deserta deserta</i> Kaszab, 1981       | SP90 | 2 | 9  | 1  | 1  | 0 | 13 | 6  | 3  | 4  | 5  | 9  | 27  | 0 | 0 | 0 | 0 | 0 | 0  | 40  |
| Tenebrionidae | <i>Tentyrina palmeri</i> (Crotch, 1872)             | SP91 | 0 | 0  | 0  | 0  | 0 | 0  | 2  | 2  | 0  | 0  | 0  | 4   | 0 | 0 | 0 | 0 | 0 | 0  | 4   |
| Tenebrionidae | <i>Thraustocolus arabicus</i> Kaszab, 1979          | SP92 | 1 | 0  | 0  | 0  | 0 | 1  | 0  | 0  | 0  | 0  | 1  | 1   | 0 | 0 | 0 | 0 | 0 | 0  | 2   |
| Tenebrionidae | <i>Thriptera kraatzii</i> (Haag-Rutenberg, 1876)    | SP93 | 2 | 2  | 13 | 19 | 3 | 39 | 0  | 0  | 3  | 0  | 0  | 3   | 0 | 0 | 2 | 4 | 5 | 11 | 53  |
| Tenebrionidae | <i>Trachyderma philistina</i> Reiche & Saulcy, 1857 | SP94 | 8 | 11 | 23 | 19 | 6 | 67 | 11 | 3  | 2  | 6  | 6  | 28  | 0 | 0 | 0 | 1 | 0 | 1  | 96  |
| Tenebrionidae | <i>Zophosis complanata</i> Solier, 1834             | SP18 | 0 | 1  | 0  | 1  | 0 | 2  | 0  | 0  | 0  | 0  | 0  | 0   | 0 | 0 | 0 | 0 | 0 | 0  | 2   |
| Tenebrionidae | <i>Zophosis punctata</i> Brullé , 1832              | SP95 | 0 | 0  | 0  | 0  | 0 | 0  | 76 | 13 | 95 | 28 | 25 | 237 | 0 | 0 | 0 | 0 | 0 | 0  | 237 |
